# Supplementary material
Source: PubMed Central journal article supplement (PMC3206314)
Supplement: NIHMS324735-supplement-Supplement1.pdf [file NIHMS324735-supplement-Supplement1.pdf]

## Supplementary Appendix

This appendix has been provided by the authors to give readers additional information about their work.

Supplement to: Boggs DA, Rosenberg L, Cozier YC, et al. General and abdominal obesity and risk of death among black women. *N Engl J Med* 2011;365:901-8.

Table 1. Body-mass index and waist circumference in relation to all-cause mortality, according to smoking status, in the Black Women's Health Study, 1995-2008.

|                              | Body-mass index (kg/m <sup>2</sup> ) |                  |                  |                  |                  |                  |                  |                  |                  |
|------------------------------|--------------------------------------|------------------|------------------|------------------|------------------|------------------|------------------|------------------|------------------|
|                              | 15.0-18.4                            | 18.5-19.9        | 20.0-22.4        | 22.5-24.9        | 25.0-27.4        | 27.5-29.9        | 30.0-34.9        | 35.0-39.9        | 40.0-49.9        |
| Never smokers                |                                      |                  |                  |                  |                  |                  |                  |                  |                  |
| No. of deaths                | 12                                   | 23               | 70               | 110              | 140              | 112              | 147              | 82               | 74               |
| Person-years                 | 6,938                                | 17,504           | 64,051           | 83,914           | 79,639           | 49,608           | 65,913           | 30,991           | 20,507           |
| HR (95% CI) <sup>1</sup>     | 1.89 (1.03-3.44)                     | 1.36 (0.87-2.14) | 1.02 (0.76-1.39) | 1.00 (Ref.)      | 1.12 (0.87-1.44) | 1.31 (1.01-1.72) | 1.27 (0.99-1.64) | 1.51 (1.13-2.02) | 2.19 (1.62-2.95) |
| Former smokers               |                                      |                  |                  |                  |                  |                  |                  |                  |                  |
| No. of deaths                | 4                                    | 12               | 40               | 60               | 83               | 70               | 90               | 53               | 44               |
| Person-years                 | 928                                  | 2,682            | 12,480           | 22,468           | 26,601           | 18,110           | 25,084           | 11,792           | 7,564            |
| HR (95% CI) <sup>1</sup>     | 1.86 (0.67-5.21)                     | 2.29 (1.22-4.31) | 1.41 (0.94-2.12) | 1.00 (Ref.)      | 1.06 (0.76-1.48) | 1.15 (0.81-1.63) | 1.04 (0.75-1.45) | 1.43 (0.98-2.09) | 2.04 (1.37-3.04) |
| Current smokers              |                                      |                  |                  |                  |                  |                  |                  |                  |                  |
| No. of deaths                | 13                                   | 26               | 63               | 121              | 97               | 63               | 96               | 32               | 36               |
| Person-years                 | 1,797                                | 3,985            | 13,570           | 20,622           | 22,632           | 15,008           | 18,674           | 7,843            | 4,526            |
| HR (95% CI) <sup>1</sup>     | 1.51 (0.85-2.71)                     | 1.06 (0.68-1.65) | 0.90 (0.66-1.23) | 1.00 (Ref.)      | 0.68 (0.52-0.89) | 0.67 (0.49-0.91) | 0.85 (0.65-1.12) | 0.73 (0.49-1.08) | 1.48 (1.01-2.15) |
| Waist circumference (inches) |                                      |                  |                  |                  |                  |                  |                  |                  |                  |
|                              | 22-25                                | 26-27            | 28-29            | 30-31            | 32-33            | 34-35            | 36-37            | 38-39            | 40-47            |
| Never smokers                |                                      |                  |                  |                  |                  |                  |                  |                  |                  |
| No. of deaths                | 41                                   | 53               | 76               | 79               | 91               | 91               | 74               | 52               | 79               |
| Person-years                 | 29,651                               | 49,550           | 60,765           | 50,370           | 50,647           | 40,354           | 29,309           | 23,661           | 25,938           |
| HR (95% CI) <sup>1</sup>     | 1.32 (0.88-1.98)                     | 1.00 (Ref.)      | 1.05 (0.74-1.49) | 1.14 (0.80-1.61) | 1.20 (0.85-1.69) | 1.38 (0.98-1.94) | 1.56 (1.09-2.23) | 1.32 (0.90-1.95) | 1.75 (1.17-2.61) |
| HR (95% CI) <sup>2</sup>     | 1.28 (0.84-1.94)                     | 1.00 (Ref.)      | 1.05 (0.74-1.51) | 1.12 (0.77-1.62) | 1.15 (0.79-1.67) | 1.29 (0.88-1.90) | 1.41 (0.94-2.13) | 1.15 (0.73-1.79) | 1.40 (0.90-2.19) |
| Former smokers               |                                      |                  |                  |                  |                  |                  |                  |                  |                  |
| No. of deaths                | 14                                   | 22               | 34               | 51               | 56               | 53               | 52               | 43               | 54               |
| Person-years                 | 5,172                                | 10,556           | 14,261           | 15,942           | 16,850           | 14,268           | 10,859           | 9,343            | 11,466           |
| HR (95% CI) <sup>1</sup>     | 1.37 (0.70-2.69)                     | 1.00 (Ref.)      | 1.10 (0.64-1.88) | 1.27 (0.77-2.10) | 1.14 (0.69-1.88) | 1.29 (0.78-2.14) | 1.66 (0.99-2.75) | 1.52 (0.90-2.56) | 1.63 (0.98-2.69) |
| HR (95% CI) <sup>2</sup>     | 1.12 (0.56-2.24)                     | 1.00 (Ref.)      | 1.21 (0.70-2.08) | 1.58 (0.94-2.67) | 1.50 (0.88-2.57) | 1.74 (1.00-3.04) | 2.27 (1.28-4.01) | 2.04 (1.13-3.70) | 2.08 (1.13-3.81) |
| Current smokers              |                                      |                  |                  |                  |                  |                  |                  |                  |                  |
| No. of deaths                | 33                                   | 57               | 57               | 46               | 65               | 63               | 48               | 39               | 52               |
| Person-years                 | 6,211                                | 9,711            | 13,299           | 13,287           | 14,699           | 12,784           | 9,311            | 7,439            | 7,340            |
| HR (95% CI) <sup>1</sup>     | 0.84 (0.54-1.30)                     | 1.00 (Ref.)      | 0.68 (0.47-0.99) | 0.54 (0.36-0.80) | 0.64 (0.45-0.92) | 0.71 (0.49-1.01) | 0.77 (0.52-1.13) | 0.72 (0.48-1.09) | 1.00 (0.68-1.47) |
| HR (95% CI) <sup>2</sup>     | 0.79 (0.51-1.24)                     | 1.00 (Ref.)      | 0.71 (0.49-1.03) | 0.60 (0.40-0.90) | 0.77 (0.52-1.14) | 0.89 (0.59-1.33) | 1.00 (0.64-1.56) | 0.94 (0.58-1.53) | 1.24 (0.76-2.03) |

<sup>1</sup> Adjusted for age, follow-up cycle, education, marital status, vigorous physical activity, alcohol intake, and pack-years of smoking (former and current smokers only).

<sup>2</sup> Adjusted for age, follow-up cycle, education, marital status, vigorous physical activity, alcohol intake, pack-years of smoking (former and current smokers only), and BMI.
